# Supplementary material for: Effects of spin–orbit coupling and many-body correlations in STM transport through copper phthalocyanine
Source: publisher site journal article supplement (doi:10.3762/bjnano.6.254), 2015-12-22
Supplement: Additional file 1 [file 2190-4286-6-254-S1.pdf]

# **Supporting Information**

for

## **Effects of spin–orbit coupling and many-body correlations in STM-transport through copper phthalocyanine**

Benjamin Siegert\*, Andrea Donarini and Milena Grifoni

Address: Institut für Theoretische Physik, Universität Regensburg, D-93040, Germany

Email: Benjamin Siegert\* - [benjamin.siegert@ur.de](mailto:benjamin.siegert@ur.de)

\* Corresponding author

**Transformation from the atomic to the molecular orbital basis**

## Transformation from the atomic to the molecular orbital basis

The Hamiltonian of a molecule in Born-Oppenheimer approximation, after dismissing terms which only depend on the positions of the nuclei and are therefore constant, can be written as

$$\begin{aligned} \hat{H} = & \sum_{\substack{\alpha\beta\sigma \\ mn}} (h_{\alpha m, \beta n} + \Delta V_{\alpha m, \beta n}^{\text{ion}}) \hat{d}_{\alpha m \sigma}^\dagger \hat{d}_{\beta n \sigma} \\ & + \frac{1}{2} \sum_{\substack{\alpha\beta\gamma\delta \\ mnop}} \sum_{\sigma\sigma'} V_{\alpha\beta\gamma\delta}^{mnop} \hat{d}_{\alpha m \sigma}^\dagger \hat{d}_{\gamma p \sigma'}^\dagger \hat{d}_{\delta q \sigma'} \hat{d}_{\beta n \sigma}, \end{aligned} \quad (1)$$

where  $\hat{d}_{\alpha m \sigma}^\dagger$  creates an electron in the atomic orbital  $|\alpha m \sigma\rangle$  with orbital quantum number  $m$  and spin  $\sigma$  centered at atom  $\alpha$ . Further we have defined

$$h_{\alpha m, \beta n} := \epsilon_{\alpha m} \delta_{\alpha \beta} \delta_{mn} + b_{\alpha m, \beta n}, \quad (2)$$

where  $\epsilon_{\alpha m}$  is the energy of orbital  $m$  on atom  $\alpha$  and  $b_{\alpha m, \beta n}$  is the hopping integral between orbital  $m$  on atom  $\alpha$  and orbital  $n$  on atom  $\beta$ . All non-hopping terms can be condensed in the crystal field correction

$$\Delta V_{\alpha m, \beta n}^{\text{ion}} := \sum_{\gamma}^{\gamma \neq \alpha, \beta} \langle \alpha m \sigma | \hat{V}_{\gamma} | \beta n \sigma \rangle, \quad (3)$$

where  $\hat{V}_{\gamma}$  is the atomic core potential at  $\mathbf{r}_{\gamma}$ . Equation (3) defines the crystal field correction to the single particle Hamiltonian. Finally, we have the ordinary matrix elements  $V_{\alpha\beta\gamma\delta}^{mnop}$  of the Coulomb interaction.

The  $h_{\alpha m, \beta n}$  are elements of a matrix  $\mathbf{h}$  which corresponds to the single particle Hamiltonian of the molecule with only onsite energies and hopping terms. After performing a transformation to the molecular orbital basis, in which  $\mathbf{h}$  is diagonal,  $|i\sigma\rangle = \sum_{\alpha m} c_{i\alpha m} |\alpha m \sigma\rangle$ , and using the approximation that the basis  $|\alpha m \sigma\rangle$  is orthogonal, the Hamiltonian reads:

$$\begin{aligned} \hat{H} = & \sum_{ij\sigma} (\epsilon_i \delta_{ij} + \Delta V_{ij}^{\text{ion}}) \hat{d}_{i\sigma}^\dagger \hat{d}_{j\sigma} \\ & + \frac{1}{2} \sum_{ijkl} \sum_{\sigma\sigma'} V_{ijkl} \hat{d}_{i\sigma}^\dagger \hat{d}_{k\sigma'}^\dagger \hat{d}_{l\sigma'} \hat{d}_{j\sigma}, \end{aligned} \quad (4)$$

where  $\Delta V_{ij}^{\text{ion}}$  now is

$$\Delta V_{ij}^{\text{ion}} = \sum_{\substack{\alpha\beta \\ mn}} c_{i\alpha m}^* c_{j\beta n} \Delta V_{\alpha m, \beta n}^{\text{ion}}. \quad (5)$$
